# Supplementary material for: Conductive gold nanoparticle assembly linked through interactions between the radical cations of ethylene- and propylene-3,4-dioxythiophene mixed tetramer thiolate
Source: Royal Society of Chemistry journal article supplement (doi:10.1039/d1ma00493j), 2022-01-01
Supplement: d1ma00493j1.pdf [file d1ma00493j1.pdf]

## Conductive gold nanoparticles assembly linked through interaction between radical cations of ethylene- and propylene-3,4-dioxythiophene mixed tetramer thiolate

Tohru Nishinaga,\* Kazuki Matsuo, Tomoya Koizumi and Ken-ichi Sugiura

*Department of Chemistry, Graduate School of Science, Tokyo Metropolitan University, Hachioji, Tokyo 192-0397, Japan*

### Contents

|                                                                                                                                                      |    |
|------------------------------------------------------------------------------------------------------------------------------------------------------|----|
| 1. General                                                                                                                                           | S2 |
| 2. Synthesis                                                                                                                                         | S2 |
| 3. Fig. S1. <sup>1</sup> H NMR of <b>2</b>                                                                                                           | S4 |
| 4. Fig. S2. A TEM image and distribution of AuNPs <b>2</b>                                                                                           | S5 |
| 5. Fig. S3. ESR spectra of <b>2</b> oxidized with AgSbF <sub>6</sub>                                                                                 | S5 |
| 6. Fig. S4. Calculated spin distribution of E <sub>2</sub> P <sub>2</sub> thiolate of Au <sub>13</sub><br>cluster in the one-electron oxidized state | S6 |
| 7. Cartesian Coordinates of Optimized Structures                                                                                                     | S8 |

## General

$^1\text{H}$  and  $^{13}\text{C}$  NMR spectra were recorded on a Bruker AV500 instrument. Chemical shifts are reported in ppm with reference to tetramethylsilane using the signal of the solvent  $\text{C}_6\text{D}_6$ . APCI mass spectra were recorded on a Bruker MicrOTOFII-SD. Only the more intense or structurally diagnostic mass spectral fragment ion peaks are reported. Electronic absorption spectra were recorded on a SHIMADZU UV-Vis-NIR scanning spectrophotometer (Model UV-3101-PC). Cyclic voltammetry (CV) was performed on a BAS-ALS620B electrochemical analyzer using a standard three-electrode cell consisting of a Pt working electrode, a Pt wire counter electrode, and a Ag/AgCl reference electrode. The potentials were calibrated with ferrocene as an external standard. Transmission electron microscopy (TEM) was carried out using JEOL JEM-3200FS electron microscopes for the drop-cast films on a carbon-supported copper grid. ESR spectra were recorded on a Bruker E500 instrument. The electric conductivity was evaluated using Pt interdigitated array (IDA) electrodes (each array consists of 65 fingers with a 5  $\mu\text{m}$  gap between fingers, 2000  $\mu\text{m}$  finger length, 10  $\mu\text{m}$  finger width, and 100 nm finger height (90 nm Pt and 10 nm Ti)) purchased from BAS Inc. and ADCMT 6241A DC Voltage/Current Source/Monitor. The dichloromethane solution of AuNPs was drop-casted on IDA electrode and dried, then conductivities of the films were measured. These procedures were repeated until the conductivity was saturated. The estimation of conductivities was according to literature.<sup>1</sup> Preparative gel-permeation chromatography (GPC) was performed with a JAI LC-08 chromatograph equipped with JAIGEL 1H and 2H columns.

Commercially available reagents were used as received otherwise noted. Zinc thiocyanate ( $\text{Zn}(\text{SCN})_2$ ) was dried with a heat gun in vacuum before use. THF were distilled from relevant drying agents prior to use.

## Synthesis

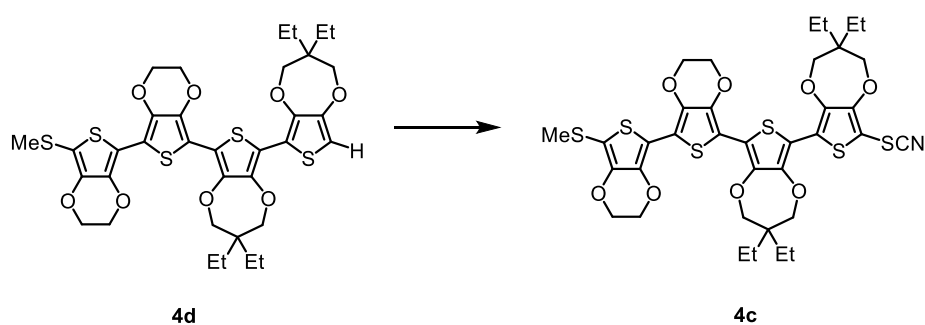

**Synthesis of thiocyanate 4c.** A solution of EDOT-ProDOT mixed tetramer **4d**<sup>2</sup> (271 mg, 0.362 mmol) and tetramethylethylenediamine (57  $\mu\text{L}$ , 0.38 mmol) in THF (5 mL) was cooled with liquid  $\text{N}_2$ -acetone bath, and *n*-BuLi (1.59 M, 0.24 mL, 0.38 mmol) was added at  $-80\text{ }^\circ\text{C}$  under  $\text{N}_2$ . The reaction mixture was stirred at the temperature for 100 min and then a suspension of  $\text{Zn}(\text{SCN})_2$  (78 mg, 0.40 mmol) in THF prepared by sonication was added. The mixture was warm to  $0\text{ }^\circ\text{C}$  with ice bath and stirred for 1 h and a suspension of *N*-chlorosuccinimide (61 mg, 0.40 mmol) in dichloromethane prepared by sonication was added. After 10 min, the reaction mixture was quenched with  $\text{NaOH}_{\text{aq}}$ , extracted with ether, and the organic layer was dried over  $\text{MgSO}_4$ . The volatiles were removed in vacuo, and the residue was passed through  $\text{Al}_2\text{O}_3$  short column eluted with dichloromethane : Hexan = 1 : 1 and purified with preparative recycle GPC eluted with toluene to give **4c** (164 mg, 0.203 mmol, 54%) as deep orange solid:  $^1\text{H}$  NMR ( $\text{C}_6\text{D}_6$ )  $\delta$  3.74(s, 2H), 3.63(s, 2H), 3.59(s, 2H), 3.52(s, 2H), 3.44 (m, 6H), 3.37(m, 2H), 2.15(s, 3H), 1.0-1.3(m, 8H), 0.61(t, 6H), 0.53(t, 6H);  $^{13}\text{C}$  NMR ( $\text{C}_6\text{D}_6$ )  $\delta$  154.4, 147.3, 144.9, 144.2, 143.6, 138.2, 137.8, 137.2, 122.9, 116.1, 112.9, 112.4, 110.6, 110.1, 109.6, 107.7, 93.3, 78.0, 77.9, 77.3, 77.1, 64.9, 64.7, 64.6, 64.4, 43.73, 43.66, 23.74, 23.68, 21.0, 7.3, 7.2; MS(APCI-TOF) calcd for  $\text{C}_{36}\text{H}_{39}\text{NO}_8\text{S}_6$  [ $\text{M}^+$ ] = 805; found 805.

# <sup>1</sup>H NMR of 4c

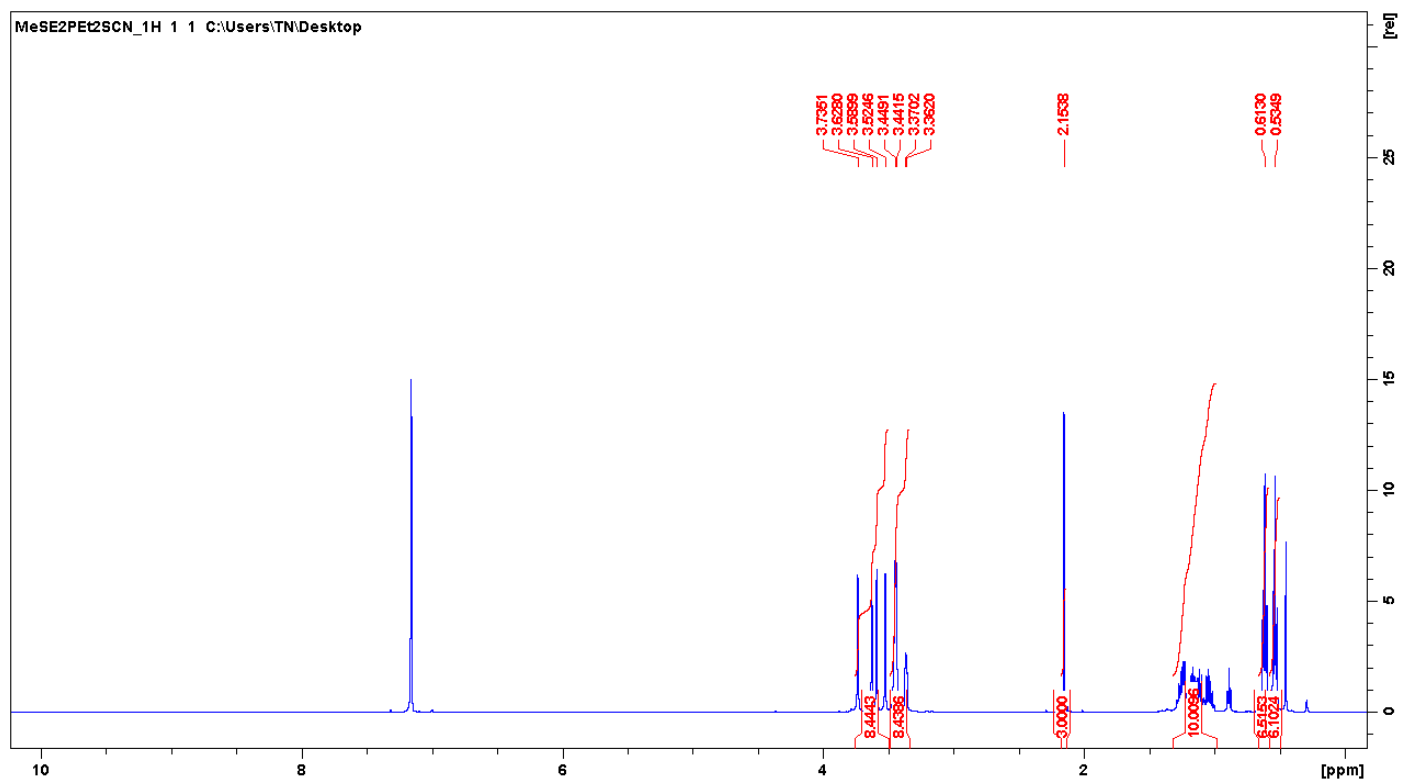

# <sup>13</sup>C NMR of 4c

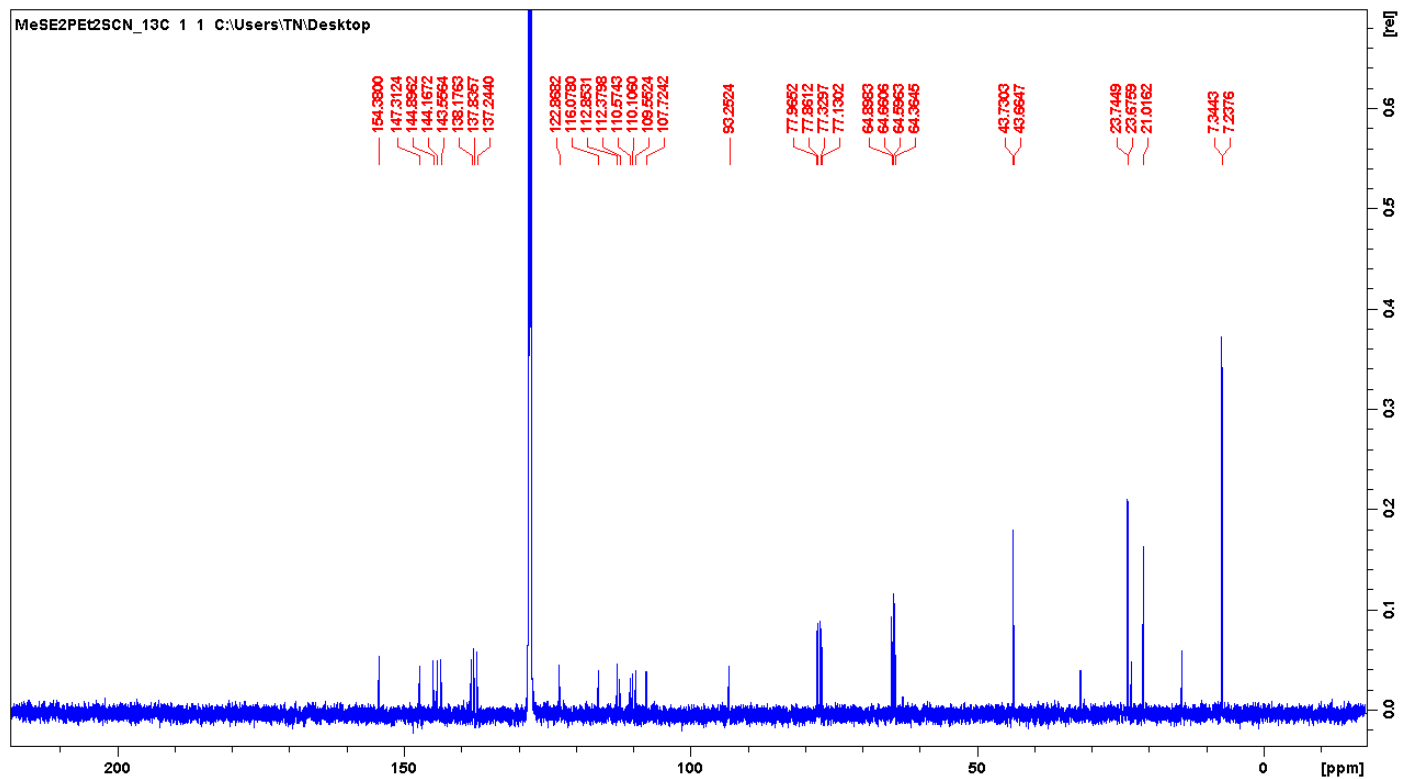

**Synthesis of AuNPs 2.** Dodecylamine (DDA) capped 2.5 nm size AuNPs in dehydrated toluene solution (10 mL) containing 0.1 M didodecyldimethylammonium bromide (DDAB) was prepared according to the literature procedure<sup>3</sup> using HAuCl<sub>4</sub>·4H<sub>2</sub>O (25 mg, 0.36 mmol), DDA (215 mg, 1.16 mmol) and tetrabutylammonium borohydride (TBAB) (60 mg, 0.23 mmol). A solution of TBAB (117 mg, 0.455 mmol) in toluene (5 mL) containing 0.1 M DDAB was added to **4c** (46 mg, 0.057 mmol) in a flask equipped with N<sub>2</sub> balloon and the mixture was sonicated. Then DDA-capped AuNPs solution was added to the mixture. After stirred overnight at rt, methanol (45 mL) was added to the mixture. After standing for additional 24 h, the precipitate was collected with a membrane filter and washed thoroughly with toluene-methanol mixed solvent (1:2) to obtain some of **AuNPs 2**. After evaporation, additional **AuNPs 2** could be collected from the residue by repeating the same filtration and washing procedure.

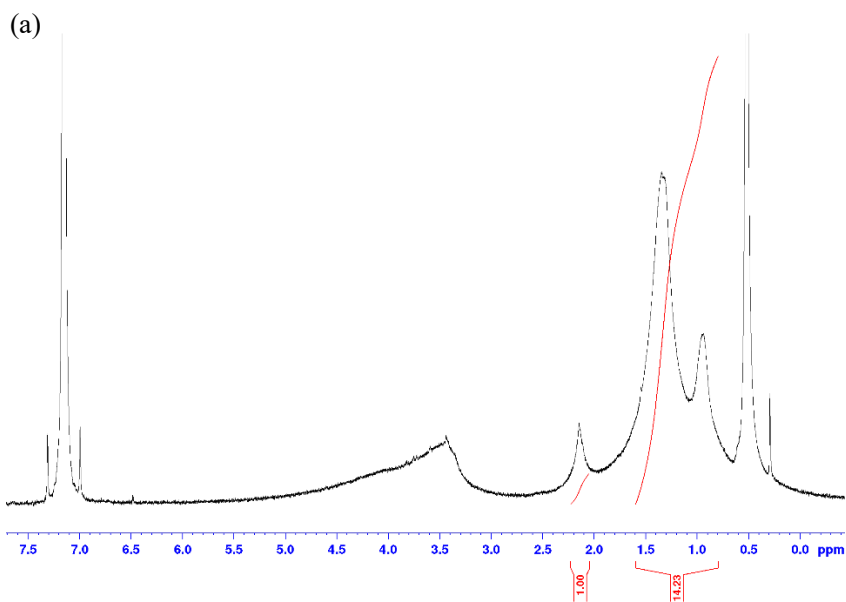

**Figure S1** <sup>1</sup>H NMR of (a) **2** in C<sub>6</sub>D<sub>6</sub>. The characteristic signal around  $\delta$ 2.2 ppm is due to the methyl proton of MeS-group in **4** moiety. The broad signal around  $\delta$ 0.8-1.6 ppm contains both methylene units of ethyl side chain in ProDOT and DDA (except for the next methylene unit to amine nitrogen). We roughly estimated the ratio between **4** and DDA from the integrals of these signals.

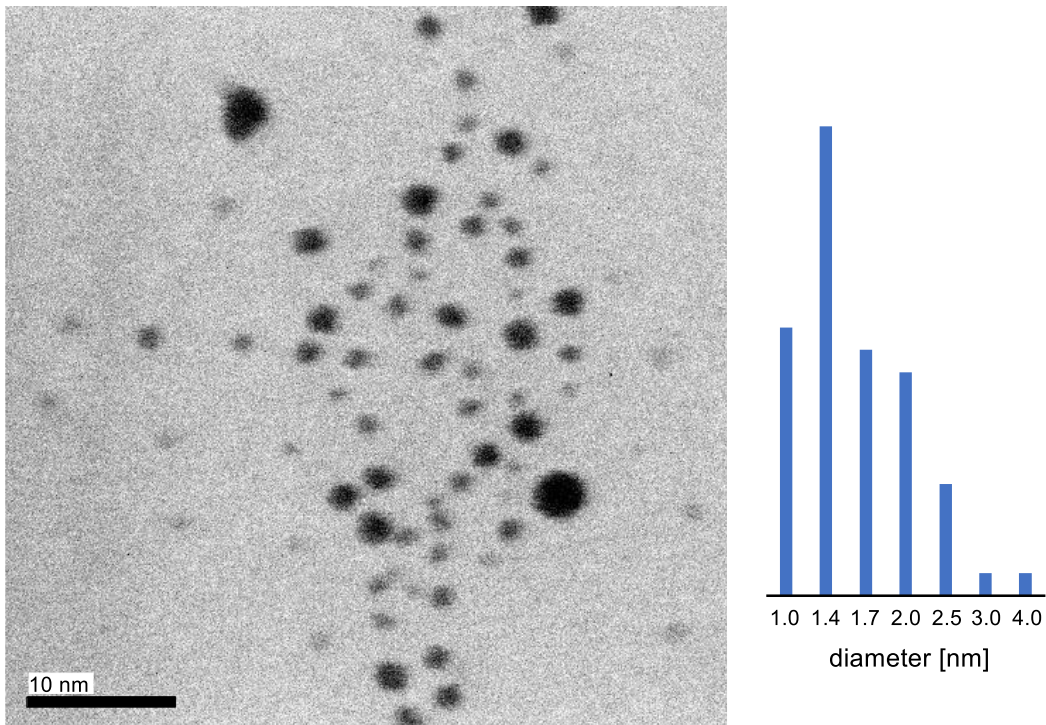

**Figure S2** A TEM image and distribution of AuNPs **2**.

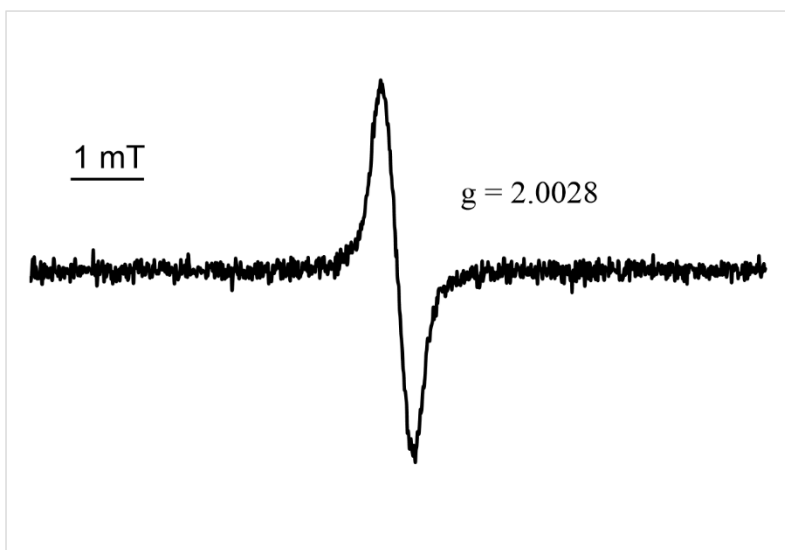

**Figure S3** ESR spectra of **2** oxidized with  $\text{AgSbF}_6$ .

## Computational Methods

DFT calculations were performed with the Gaussian 09 program.<sup>4</sup> The geometry optimization of the single E<sub>2</sub>P<sub>2</sub> thiolate on 12 (=3 × 4) Au atoms in the (111) arrangement and one Au adatom placed on a 2-fold hollow in the neutral and oxidized states were conducted with the M06 method and LanL2DZ (Au) and 6-31G(d) (C,H,O,S) basis sets. The position of only all Au atoms were fixed. The thiolate atom was also restricted so that the distances to the neighboring Au atoms were identical.

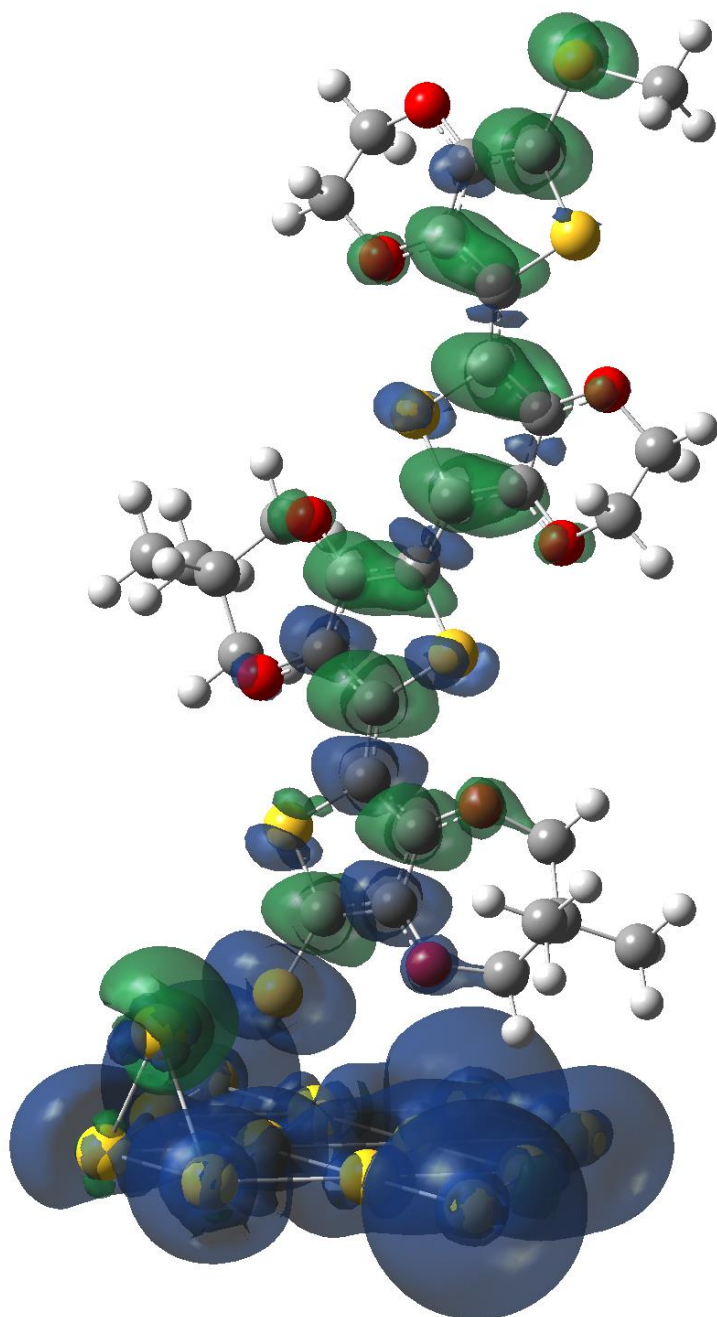

**Figure S4** Calculated spin distribution of E<sub>2</sub>P<sub>2</sub> thiolate of Au<sub>13</sub> cluster in the one-electron oxidized state.

Ref.

1. W. P. Wuelfing, S. J. Green, J. J. Pietron, D. E. Cliffel and R. W. Murray, *J. Am. Chem. Soc.*, 2000, **122**, 11465–11472.
2. T. Nishinaga, Y. Kanzaki, D. Shiomi, K. Matsuda, S. Suzuki and K. Okada, *Chem. Eur. J.*, 2018, **24**, 11717–11728.
3. T. Zdobinsky, P. Sankar Maiti and R. Klajn, *J. Am. Chem. Soc.*, 2014, **136**, 2711–2714.
4. Gaussian 09, Revision D.01, Frisch, M. J.; Trucks, G. W.; Schlegel, H. B.; Scuseria, G. E.; Robb, M. A.; Cheeseman, J. R.; Scalmani, G.; Barone, V.; Mennucci, B.; Petersson, G. A.; Nakatsuji, H.; Caricato, M.; Li, X.; Hratchian, H. P.; Izmaylov, A. F.; Bloino, J.; Zheng, G.; Sonnenberg, J. L.; Hada, M.; Ehara, M.; Toyota, K.; Fukuda, R.; Hasegawa, J.; Ishida, M.; Nakajima, T.; Honda, Y.; Kitao, O.; Nakai, H.; Vreven, T.; Montgomery, Jr., J. A.; Peralta, J. E.; Ogliaro, F.; Bearpark, M.; Heyd, J. J.; Brothers, E.; Kudin, K. N.; Staroverov, V. N.; Kobayashi, R.; Normand, J.; Raghavachari, K.; Rendell, A.; Burant, J. C.; Iyengar, S. S.; Tomasi, J.; Cossi, M.; Rega, N.; Millam, J. M.; Klene, M.; Knox, J. E.; Cross, J. B.; Bakken, V.; Adamo, C.; Jaramillo, J.; Gomperts, R.; Stratmann, R. E.; Yazyev, O.; Austin, A. J.; Cammi, R.; Pomelli, C.; Ochterski, J. W.; Martin, R. L.; Morokuma, K.; Zakrzewski, V. G.; Voth, G. A.; Salvador, P.; Dannenberg, J. J.; Dapprich, S.; Daniels, A. D.; Farkas, O.; Foresman, J. B.; Ortiz, J. V.; Cioslowski, J.; Fox, D. J. Gaussian, Inc., Wallingford CT, 2009.

**Table S1.** Cartesian coordinate of optimized structure of E<sub>2</sub>P<sub>2</sub> thiolate of Au<sub>13</sub> cluster in the neutral state

|    |             |             |             |
|----|-------------|-------------|-------------|
| Au | -3.93202353 | -3.23841415 | -2.07078379 |
| Au | -3.86980419 | -0.60844879 | -3.24288116 |
| Au | -3.25136079 | 1.68167872  | -1.60971093 |
| Au | -3.18914145 | 4.31164408  | -2.78180829 |
| Au | -2.63291740 | 3.97180623  | 0.02345931  |
| Au | -2.69513675 | 1.34184088  | 1.19555668  |
| Au | -3.31358014 | -0.94828664 | -0.43761356 |
| Au | -3.37579949 | -3.57825200 | 0.73448381  |
| Au | -2.81957545 | -3.91808984 | 3.53975141  |
| Au | -2.75735610 | -1.28812448 | 2.36765404  |
| Au | -2.13891271 | 1.00200303  | 4.00082428  |
| Au | -2.07669336 | 3.63196839  | 2.82872691  |
| Au | -1.47749977 | -2.21040735 | -3.17210826 |
| S  | -0.51692696 | -1.14995103 | -0.74165352 |
| C  | 1.07514078  | -0.61415822 | -0.81656480 |
| S  | 2.45984761  | -1.68338207 | -1.00750369 |
| C  | 1.49873230  | 0.72954623  | -0.71703466 |
| C  | 3.58352728  | -0.33747422 | -0.89465811 |
| C  | 2.88654767  | 0.87757128  | -0.76951327 |
| O  | 0.60691827  | 1.72307837  | -0.64130750 |
| C  | 4.98038036  | -0.50021476 | -0.89676714 |
| O  | 3.55864777  | 2.05084945  | -0.78895425 |
| C  | 0.79756177  | 2.67308277  | 0.40335714  |
| S  | 6.10841485  | 0.84161793  | -0.72782671 |
| C  | 5.67846596  | -1.71029339 | -0.96258136 |
| C  | 3.28297209  | 2.98887124  | 0.25235073  |
| C  | 1.92097857  | 3.67049515  | 0.15415467  |
| H  | -0.16780606 | 3.19927765  | 0.47071742  |
| H  | 0.95116682  | 2.13351937  | 1.35667481  |
| C  | 7.48072736  | -0.24800077 | -0.67904451 |
| C  | 7.06468191  | -1.57046137 | -0.83526704 |
| O  | 5.04377280  | -2.88689973 | -1.15248746 |
| H  | 3.38896274  | 2.48213742  | 1.22856353  |
| H  | 4.08319064  | 3.73607705  | 0.16293910  |
| C  | 1.84980080  | 4.70429916  | 1.27750803  |
| C  | 1.74453532  | 4.34768280  | -1.20057830 |
| C  | 8.81188342  | 0.20639528  | -0.51112541 |
| O  | 7.94885157  | -2.59630220 | -0.89934800 |
| C  | 5.26422100  | -3.88621798 | -0.15626407 |
| H  | 1.94051530  | 4.23897265  | 2.27050239  |
| H  | 2.64936397  | 5.45116840  | 1.17566794  |
| H  | 0.88879896  | 5.23640257  | 1.24522139  |
| H  | 0.75959981  | 4.83346288  | -1.26131273 |
| H  | 2.51539464  | 5.11695703  | -1.35134207 |
| H  | 1.81246986  | 3.62897279  | -2.02462656 |
| C  | 9.24475337  | 1.51761381  | -0.36317954 |
| S  | 10.19364803 | -0.88562694 | -0.44269105 |
| C  | 7.76478849  | -3.63068465 | 0.06313234  |
| C  | 6.61704336  | -4.58733919 | -0.25416267 |
| H  | 5.13147571  | -3.43186993 | 0.84186266  |
| H  | 4.45738697  | -4.61519683 | -0.30894968 |
| C  | 10.63231713 | 1.64496669  | -0.18502800 |
| O  | 8.40855626  | 2.58090172  | -0.38051990 |
| C  | 11.31374666 | 0.44102063  | -0.19546253 |
| H  | 8.71351439  | -4.18475491 | 0.06715161  |
| H  | 7.62807375  | -3.17723098 | 1.06162102  |
| C  | 6.80065061  | -5.19940230 | -1.63821933 |



|   |             |             |             |
|---|-------------|-------------|-------------|
| C | 6.63319840  | -5.67756038 | 0.81613839  |
| O | 11.23979642 | 2.85114651  | -0.01290223 |
| C | 9.09835807  | 3.81833186  | -0.53292528 |
| C | 12.71607304 | 0.23556629  | -0.03609889 |
| H | 7.75682024  | -5.73805926 | -1.69759840 |
| H | 5.99609688  | -5.91649634 | -1.85226438 |
| H | 6.79221145  | -4.43459473 | -2.42208263 |
| H | 5.82886258  | -6.40556074 | 0.64532224  |
| H | 7.58466952  | -6.22651282 | 0.79776294  |
| H | 6.50292290  | -5.26221725 | 1.82597104  |
| C | 10.31290066 | 3.86009936  | 0.36505983  |
| H | 8.38257874  | 4.60468403  | -0.27444448 |
| H | 9.40175290  | 3.93831916  | -1.58380669 |
| C | 13.41238447 | -0.95771727 | -0.06147612 |
| S | 13.84555399 | 1.56545355  | 0.21340343  |
| H | 10.01193957 | 3.71110985  | 1.41383850  |
| H | 10.83681990 | 4.81669966  | 0.27490689  |
| C | 14.80769729 | -0.82106314 | 0.11894546  |
| O | 12.82301606 | -2.16506533 | -0.23976175 |
| C | 15.20800638 | 0.48222106  | 0.28043723  |
| O | 15.66154039 | -1.87758288 | 0.12516751  |
| C | 13.76182651 | -3.18303370 | -0.57787617 |
| S | 16.87273832 | 0.95406331  | 0.53562030  |
| C | 14.97468351 | -3.10487732 | 0.32090452  |
| H | 14.06309362 | -3.06577771 | -1.63006247 |
| H | 13.23867442 | -4.13671007 | -0.45897076 |
| C | 16.70179100 | 2.75624002  | 0.65085200  |
| H | 15.68751993 | -3.90282762 | 0.09030333  |
| H | 14.66520383 | -3.19401150 | 1.37450861  |
| H | 16.09103028 | 3.04766172  | 1.51285830  |
| H | 17.71412194 | 3.14777211  | 0.78868877  |
| H | 16.28440091 | 3.17726417  | -0.27085664 |

**Table S2.** Cartesian coordinate of optimized structure of **4a**

|   |             |             |             |
|---|-------------|-------------|-------------|
| C | -1.50140547 | -1.65643558 | -0.20765502 |
| S | -2.55965349 | 0.68792343  | -0.24583614 |
| C | -2.89792836 | -1.85989080 | -0.12285731 |
| O | -3.45090990 | -3.10139687 | -0.05267716 |
| O | -0.61688789 | -2.69099694 | -0.21462529 |
| C | -2.50004307 | -4.10460043 | 0.27570042  |
| H | -2.25967343 | -4.05079491 | 1.34938123  |
| H | -2.97829510 | -5.06641770 | 0.06499294  |
| C | -1.24131810 | -3.92475556 | -0.54030097 |
| H | -0.51062766 | -4.71046477 | -0.32405001 |
| H | -1.48436616 | -3.94572249 | -1.61432997 |
| C | -1.12997489 | -0.33221314 | -0.27411398 |
| C | -3.63393234 | -0.69687566 | -0.13298046 |
| C | -5.06173647 | -0.56500040 | -0.07772584 |
| C | -5.80896848 | 0.59189998  | -0.13354884 |
| S | -6.13303387 | -1.94735104 | 0.04284406  |
| C | -7.21233040 | 0.38215198  | -0.10194978 |
| O | -5.26576786 | 1.83861534  | -0.22846046 |
| O | -8.10617391 | 1.40046941  | -0.15868133 |
| C | -6.20579294 | 2.78255757  | -0.72096782 |
| C | -7.50514058 | 2.67185888  | 0.04284853  |
| H | -6.38308960 | 2.60562842  | -1.79374442 |
| H | -5.75363411 | 3.77098646  | -0.59165975 |
| H | -8.23097682 | 3.41550458  | -0.30232849 |
| H | -7.31656906 | 2.82796778  | 1.11716715  |

|   |              |             |             |
|---|--------------|-------------|-------------|
| C | -7.56024248  | -0.94136357 | -0.01694803 |
| S | -9.16532725  | -1.63598154 | 0.03466339  |
| C | -9.63561644  | -1.20954741 | 1.74834213  |
| H | -9.69154375  | -0.12293134 | 1.86875940  |
| H | -10.62421987 | -1.64447337 | 1.93017635  |
| H | -8.91676629  | -1.63135961 | 2.45832902  |
| C | 0.19706435   | 0.20596725  | -0.35139491 |
| C | 0.56703815   | 1.53315243  | -0.39792106 |
| S | 1.61829733   | -0.82118131 | -0.43176047 |
| C | 1.96796989   | 1.73044824  | -0.46457032 |
| O | -0.33738049  | 2.54994192  | -0.41710105 |
| C | 2.69583738   | 0.56179221  | -0.46683234 |
| O | 2.55233546   | 2.95514531  | -0.55027821 |
| C | -0.21929483  | 3.48304155  | 0.65023891  |
| C | 4.12521341   | 0.42658850  | -0.43787151 |
| C | 2.27899343   | 3.83531000  | 0.53325933  |
| C | 0.90531718   | 4.50138220  | 0.46934810  |
| H | -1.18495862  | 4.00691750  | 0.68176561  |
| H | -0.09748470  | 2.93513784  | 1.60237376  |
| C | 4.85471582   | -0.74340522 | -0.44106568 |
| S | 5.20438448   | 1.80200174  | -0.35489221 |
| H | 2.40028192   | 3.28968939  | 1.48710092  |
| H | 3.06150325   | 4.60529019  | 0.48009685  |
| C | 0.73866544   | 5.24160581  | -0.85286809 |
| C | 0.82430140   | 5.48098484  | 1.63842679  |
| C | 6.26185996   | -0.55198376 | -0.33800643 |
| O | 4.26378228   | -1.95932789 | -0.60205543 |
| C | 6.61380680   | 0.77333460  | -0.26994655 |
| H | -0.23161180  | 5.75683981  | -0.88684825 |
| H | 1.52709284   | 5.99726715  | -0.97577391 |
| H | 0.78901734   | 4.55434865  | -1.70376208 |
| H | 1.60801649   | 6.24654800  | 1.55933835  |
| H | -0.14435636  | 5.99905276  | 1.64749873  |
| H | 0.94420725   | 4.97426825  | 2.60714294  |
| O | 7.16343823   | -1.56379655 | -0.34044021 |
| C | 4.49206987   | -2.89627661 | 0.44070903  |
| S | 8.22150618   | 1.46129052  | -0.15808613 |
| C | 6.98040397   | -2.55010310 | 0.66450971  |
| C | 5.86665764   | -3.55906869 | 0.38644665  |
| H | 4.33814922   | -2.40338373 | 1.41856398  |
| H | 3.70983027   | -3.65900005 | 0.31862934  |
| C | 8.46483019   | 1.37224910  | 1.65036471  |
| H | 7.94103452   | -3.08118082 | 0.71846268  |
| H | 6.80922693   | -2.05516684 | 1.63884252  |
| C | 5.91275268   | -4.60115322 | 1.50208331  |
| C | 6.08275833   | -4.22368730 | -0.96801155 |
| H | 8.49037188   | 0.32980050  | 1.98686792  |
| H | 9.42862146   | 1.84316428  | 1.87201890  |
| H | 7.66938280   | 1.91450528  | 2.17271397  |
| H | 5.76374806   | -4.14721827 | 2.49284007  |
| H | 5.13202028   | -5.36070053 | 1.35956266  |
| H | 6.88077307   | -5.12039997 | 1.51234562  |
| H | 7.05587746   | -4.73371094 | -0.99679649 |
| H | 5.30217056   | -4.97335251 | -1.15938474 |
| H | 6.05939981   | -3.49088595 | -1.78110638 |

**Table S3.** Cartesian coordinate of optimized structure of E<sub>2</sub>P<sub>2</sub> thiolate of Au<sub>13</sub> cluster in the one-electron oxidized state

|    |             |             |             |
|----|-------------|-------------|-------------|
| Au | -3.86633346 | -3.07700565 | -2.37228734 |
|----|-------------|-------------|-------------|

|    |             |             |             |
|----|-------------|-------------|-------------|
| Au | -3.95077046 | -0.33695538 | -3.25512149 |
| Au | -3.36743723 | 1.79094996  | -1.40413730 |
| Au | -3.45187423 | 4.53100024  | -2.28697145 |
| Au | -2.78410398 | 3.91885530  | 0.44684689  |
| Au | -2.69966698 | 1.17880502  | 1.32968105  |
| Au | -3.28300022 | -0.94910031 | -0.52130314 |
| Au | -3.19856321 | -3.68915059 | 0.36153101  |
| Au | -2.53079297 | -4.30129553 | 3.09534936  |
| Au | -2.61522998 | -1.56124525 | 2.21251520  |
| Au | -2.03189674 | 0.56666009  | 4.06349939  |
| Au | -2.11633374 | 3.30671036  | 3.18066524  |
| Au | -1.49522687 | -1.83152735 | -3.43107806 |
| S  | -0.50086014 | -0.99678234 | -0.93538627 |
| C  | 1.06964633  | -0.44709735 | -0.82323109 |
| S  | 2.45467100  | -1.52731403 | -0.76873023 |
| C  | 1.48285719  | 0.91474558  | -0.74811821 |
| C  | 3.56907677  | -0.16968609 | -0.64123412 |
| C  | 2.85771049  | 1.06351006  | -0.64393214 |
| O  | 0.57295328  | 1.88805709  | -0.83355745 |
| C  | 4.94766089  | -0.32435430 | -0.58283453 |
| O  | 3.54704747  | 2.22071824  | -0.63694700 |
| C  | 0.64878022  | 2.93947802  | 0.12474905  |
| S  | 6.09144435  | 1.01918386  | -0.53629235 |
| C  | 5.63847741  | -1.56233835 | -0.56368890 |
| C  | 3.13004942  | 3.25821208  | 0.25912835  |
| C  | 1.79752105  | 3.91408083  | -0.08525485 |
| H  | -0.31132121 | 3.46704753  | 0.02371529  |
| H  | 0.68466590  | 2.49665376  | 1.13772325  |
| C  | 7.45169151  | -0.08734233 | -0.45104662 |
| C  | 7.01478298  | -1.43088312 | -0.48322459 |
| O  | 4.96184639  | -2.71671824 | -0.67062188 |
| H  | 3.09939804  | 2.84845409  | 1.28364190  |
| H  | 3.93912583  | 3.99749890  | 0.20437902  |
| C  | 1.58745595  | 5.05356026  | 0.91294942  |
| C  | 1.79366599  | 4.44913390  | -1.51267714 |
| C  | 8.78195490  | 0.33206445  | -0.38350220 |
| O  | 7.91068064  | -2.43871819 | -0.50459773 |
| C  | 5.23267729  | -3.74376079 | 0.29097259  |
| H  | 1.54908925  | 4.68935977  | 1.95048696  |
| H  | 2.39454777  | 5.79485797  | 0.84018334  |
| H  | 0.64020496  | 5.57163820  | 0.70803554  |
| H  | 0.81916890  | 4.90253216  | -1.74498631 |
| H  | 2.56667758  | 5.21947417  | -1.64063713 |
| H  | 1.97663848  | 3.65573208  | -2.24600733 |
| C  | 9.25694953  | 1.65311493  | -0.36736637 |
| S  | 10.14764745 | -0.79180368 | -0.32771554 |
| C  | 7.72883386  | -3.49262121 | 0.44276188  |
| C  | 6.57807877  | -4.44031625 | 0.12010938  |
| H  | 5.14265882  | -3.31113348 | 1.30252760  |
| H  | 4.41772385  | -4.46469762 | 0.15133144  |
| C  | 10.64247172 | 1.75843907  | -0.28973544 |
| O  | 8.44307317  | 2.72224359  | -0.42807567 |
| C  | 11.30247228 | 0.52663091  | -0.25843458 |
| H  | 8.67885826  | -4.04230091 | 0.42629888  |
| H  | 7.60029120  | -3.05295441 | 1.44770044  |
| C  | 6.72000982  | -5.00781079 | -1.28783395 |
| C  | 6.62758092  | -5.56407112 | 1.15563340  |
| O  | 11.29232954 | 2.94564049  | -0.24108882 |
| C  | 9.14731088  | 3.93187690  | -0.72564626 |
| C  | 12.69305600 | 0.31015079  | -0.18129942 |

|   |              |              |              |
|---|--------------|--------------|--------------|
| H | 7. 68034376  | -5. 53032586 | -1. 39713698 |
| H | 5. 91952181  | -5. 73156593 | -1. 49263082 |
| H | 6. 67170292  | -4. 22442247 | -2. 05220328 |
| H | 5. 81942174  | -6. 28753574 | 0. 98582532  |
| H | 7. 57792219  | -6. 11063465 | 1. 08867935  |
| H | 6. 52880792  | -5. 18232263 | 2. 18222132  |
| C | 10. 41538325 | 4. 01863171  | 0. 09194373  |
| H | 8. 46316804  | 4. 75158694  | -0. 49065950 |
| H | 9. 38182488  | 3. 95103877  | -1. 79941838 |
| C | 13. 36524975 | -0. 91131130 | -0. 19010948 |
| S | 13. 86818156 | 1. 62706368  | -0. 08912097 |
| H | 10. 18024117 | 3. 97663936  | 1. 16605250  |
| H | 10. 95898195 | 4. 94325122  | -0. 12137968 |
| C | 14. 76315761 | -0. 79895681 | -0. 11387871 |
| O | 12. 73688500 | -2. 09794598 | -0. 26745873 |
| C | 15. 19996792 | 0. 50864295  | -0. 05007689 |
| O | 15. 59412178 | -1. 86683685 | -0. 09782359 |
| C | 13. 62810410 | -3. 17876686 | -0. 57178774 |
| S | 16. 87894906 | 0. 93253368  | 0. 06991853  |
| C | 14. 90006735 | -3. 06277398 | 0. 23650138  |
| H | 13. 85396346 | -3. 15906976 | -1. 64744258 |
| H | 13. 08421287 | -4. 09704358 | -0. 33364899 |
| C | 16. 77415022 | 2. 74206179  | 0. 14749911  |
| H | 15. 57977605 | -3. 89100279 | 0. 01640871  |
| H | 14. 66738039 | -3. 06481974 | 1. 31254680  |
| H | 16. 20135024 | 3. 06903226  | 1. 02255307  |
| H | 17. 80325603 | 3. 09913771  | 0. 24625829  |
| H | 16. 34442707 | 3. 15544330  | -0. 77179178 |
